# Supplementary material
Source: PubMed Central journal article supplement (PMC4934656)
Supplement: NIHMS68984-supplement-SI.pdf [file NIHMS68984-supplement-SI.pdf]

## Supporting Information

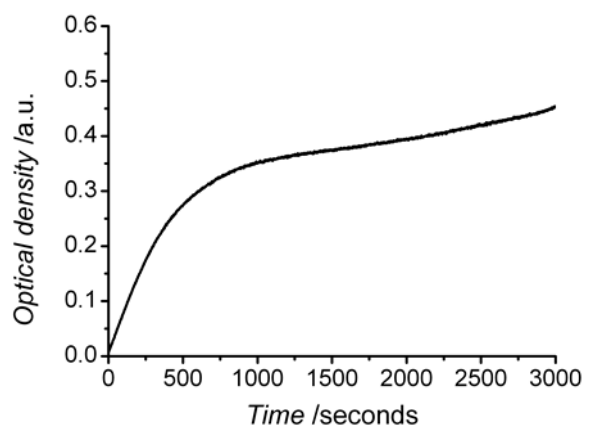

**Figure S1.** Change in optical density during CRT fibrillogenesis in pH 7.4 neutralized aqueous solution.
